# Supplementary material for: ATR1 Angiotensin II Receptor Reduces Hemoglobin S Polymerization, Phosphatidylserine Exposure and Increases Deformability of Sickle Cell Disease Erythrocytes
Source: Research Square preprint supplement (doi:10.21203/rs.3.rs-1813430/v1), 2022-07-14
Supplement: Supplementary file 1 [file 8d3da92b55300655cd86c223.docx]

***Supplementary material:***

**Supplementary Figure 1– Static adhesion experiment performed with erythrocytes from sickle cell patients**. No statistical difference was found in the experiment carried out in the presence of Ang II when compared to the control, nor of Ang II in the presence of losartan (A) or pd123319 (B). N = 4. Results expressed as SEM ± Err. * p <0.05, ** p <0.01 and *** p <0.001 vs control, with 95% confidence interval in One-way anova and Tukey posttest.

**Supplementary Figures**

**Figure 1A**

**Figure 1B**
